# Supplementary material for: A Challenge of COVID—19: Associated Infective Endocarditis with Streptococcus gordonii in a Young Immunocompetent Patient
Source: MDPI journal article supplement (doi:10.3390/medicina57121298), 2021-11-26
Supplement: s1 [file s1]

**Table S1.** Dynamics of lab data in a patient with COVID-19 infection and infective endocarditis

|                                | Normal Value | Day-1 | Day-14 | Day-30 | Day-60 | Day-180 |
|--------------------------------|--------------|-------|--------|--------|--------|---------|
| Leucocytes (/mm <sup>3</sup> ) | 4000–10000   | 7100  | 6300   | 8200   | 5100   | 5200    |
| Neutrophils %                  | 50–62        | 73.1  | 62.9   | 70.9   | 65.5   | 60.2    |
| Lymphocytes %                  | 25–40        | 19    | 34.7   | 26     | 28.8   | 31.4    |
| Hemoglobin (g/dl)              | 11,5–16      | 11.1  | 10.4   | 11.8   | 12.3   | 12.4    |
| C-reactive protein (mg/L)      | 0–5          | 67.12 | 21.24  | 4.8    | 1.94   | 1.1     |
| ESR (mm/h)                     | 42           | 92    | 32     | 36     | 16     | 12      |
| Fibrinogen (mg/dl)             | 196–372      | 439   | 426    | 629    | 244    | 220     |
| Procalcitonin                  | neg          | <0.5  | neg    | neg    | neg    | neg     |
| Lactic acid (mg/dl)            | 4.5–20       | 5.91  | 28.4   | 14.31  | 10.6   | 3.8     |
| D-Dimer (ng/ml)                | 0–500        | 661.9 | 536.98 | 417    | 360    | 320     |
| ALT (U/L)                      | 0–34         | 66    | 124    | 429    | 102    | 32      |
| HIV                            |              | neg   |        |        |        |         |
| HBsAg & HBc-Ab                 |              | neg   |        | neg    |        | neg     |
| VHC-Ab                         |              | neg   |        | neg    |        |         |
| IgM-VHA                        |              |       |        | neg    |        |         |
| Rheumatoid Factor              |              | neg   |        | neg    | neg    | neg     |
| Hematuria                      |              | +++   | ++     | -      | -      | -       |
